# Supplementary material
Source: Springer Nature journal article supplement (https://www.springermedizin.de/resource/supplementary/12985_2009_539_MOESM4_ESM.pdf/9608406)

**A.**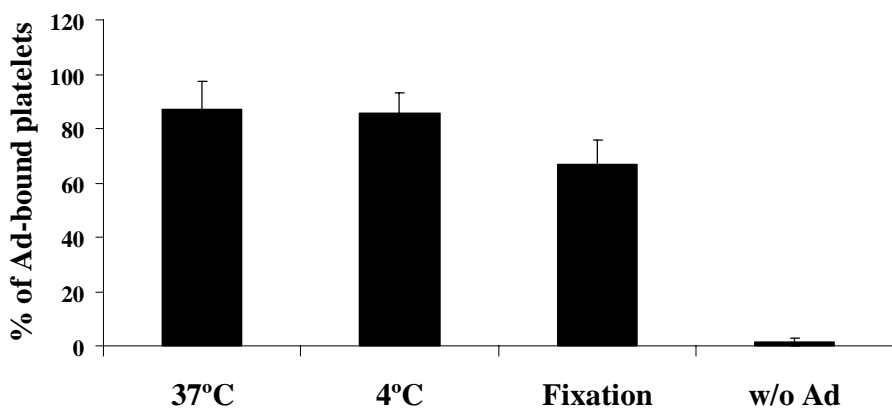**B.****-Ad****+Ad**Mo  
Cells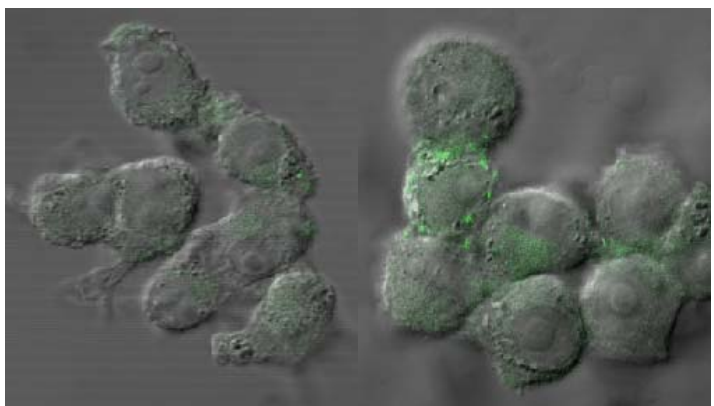

Platelets

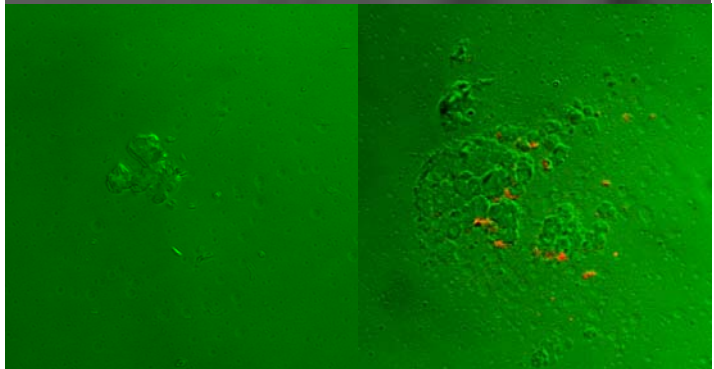

Supplement: MOESM4 [file 9608406]
